# Supplementary material for: Environmental heterogeneity shapes physiological traits in tropical direct‐developing frogs
Source: PubMed Central journal article supplement (PMC8207348; doi:10.1002/ece3.7521), 2021-05-01
Supplement: ECE3-11-6688-s001.pdf [file ECE3-11-6688-s001.pdf]

## Supplementary material

### Environmental heterogeneity shapes physiological traits in tropical direct-developing frogs

Ruth Percino-Daniel, José M. Contreras López, Oswaldo Téllez-Valdés, Fausto R. Méndez de la Cruz, Alejandro Gonzalez-Voyer and Daniel Piñero

Tables S1 to S6

Figures S1 to S10

Table S1. Mean of bioclimatic variables used for characterized the bioclimatic domains at the study area.

|                                        | Bioclimatic domains |            |              |             |             |
|----------------------------------------|---------------------|------------|--------------|-------------|-------------|
|                                        | - Green             | - Orange   | - Yellow     | - Red       | - Blue      |
| Elevation (m)                          | 376.1               | 976.7      | 1144         | 1571        | 2054        |
| Range of elevation                     | 30.1 – 915.6        | 482 - 1552 | 649.6 – 1619 | 1180 - 2061 | 1514 - 2758 |
| Bioclimatic variables                  |                     |            |              |             |             |
| 1. Annual Mean Temperature             | 25.7                | 22.3       | 21.5         | 19.4        | 17.1        |
| 2. Mean Diurnal Range                  | 12.9                | 12.7       | 11.8         | 11.2        | 10.7        |
| 3. Isothermality                       | 0.68                | 0.6        | 0.65         | 0.66        | 0.70        |
| 4. Temperature Seasonality             | 0.35                | 0.5        | 0.41         | 0.41        | 0.33        |
| 5. Max Temperature of Warmest Month    | 35.02               | 32         | 30.18        | 27.48       | 24.48       |
| 6. Min Temperature of Coldest Month    | 15.87               | 12.1       | 12.23        | 10.70       | 9.31        |
| 7. Temperature Annual Range            | 19.14               | 19.9       | 17.94        | 16.79       | 15.17       |
| 8. Mean Temperature of Wettest Quarter | 25.95               | 23.0       | 22.04        | 20.02       | 17.51       |

---

|                                               |         |        |         |         |         |
|-----------------------------------------------|---------|--------|---------|---------|---------|
| 9. Mean<br>Temperature of<br>Driest Quarter   | 24.65   | 20.7   | 20.22   | 18.15   | 16.18   |
| 10. Temperature of<br>Warmest Quarter         | 26.91   | 24.0   | 22.85   | 20.65   | 18.07   |
| 11. Mean<br>Temperature of<br>Coldest Quarter | 24.53   | 20.3   | 19.97   | 17.89   | 15.88   |
| 12. Annual<br>Precipitation                   | 2821.13 | 2123.6 | 2539.62 | 2011.07 | 1830.02 |
| 13. Precipitation of<br>Wettest Month         | 145.09  | 111.4  | 127.40  | 101.68  | 90.10   |
| 14. Precipitation of<br>Driest Month          | 1.115   | 1.2    | 2.710   | 2.637   | 3.619   |
| 15. Precipitation<br>Seasonality              | 93.59   | 97.9   | 91.68   | 90.88   | 84.03   |
| 16. Precipitation of<br>Wettest Quarter       | 1522.96 | 1200.6 | 1336.20 | 1034.79 | 891.26  |
| 17. Precipitation of<br>Driest Quarter        | 28.84   | 23.8   | 44.71   | 39.68   | 62.22   |
| 18. Precipitation of<br>Warmest Quarter       | 416.72  | 332.1  | 410.40  | 373.53  | 389.40  |
| 19. Precipitation of<br>Coldest Quarter       | 36.3    | 32.4   | 54.55   | 47.74   | 74.50   |

---

Table S2. Estimated values of the fitted linear model for body temperature ( $T_b$ ), air temperature (AirTemp) and substrate temperature (SubsTemp) with elevation, nested by population and bioclimatic domain (biodom). The bold number represents the significance values.

BodyTemp ~ Elevation + Pop + Weight + BioDom:Elevation

| <b>Body Temperature (<math>T_b</math>)</b> | <b>Estimate</b> | <b>Std. Error</b> | <b>t value</b> | <b>Pr(&gt; t )</b> |
|--------------------------------------------|-----------------|-------------------|----------------|--------------------|
| Intercept                                  | 26.95           | 0.4328            | 62.260         | < 2e-16 ***        |
| Elevation                                  | -0.006          | 0.0028            | -2.034         | 0.0434 *           |
| GNBII                                      | -1.935          | 0.4500            | -4.300         | 2.82e-05 ***       |
| SatMor                                     | -1.601          | 0.600             | -2.672         | 0.00824 *          |
| NvaLib                                     | -0797           | 1.757             | -0.454         | 0.65072            |
| Palestina                                  | 0.455           | 3.670             | 0.123          | 0.90230            |
| SalUrb                                     | 2.358           | 4193              | 0.562          | 0.57466            |
| PlanLib                                    | 1.487           | 4.570             | 0.325          | 0.74528            |
| ArrNeg                                     | 3.201           | 5406              | 0.592          | 0.55445            |
| CINvaLib                                   | -0.969          | 2.862             | -0.338         | 0.73554            |
| NBI                                        | 0.293           | 2.711             | 0.108          | 0.91402            |
| LaLoma                                     | -0.250          | 3.140             | -0.079         | 0.93675            |
| Palmas                                     | 20.906          | 7.462             | 2.801          | 0.00565 **         |
| LagLon                                     | 22.761          | 7.974             | 2.855          | 0.00483 **         |
| RLFlor                                     | 22.870          | 8.210             | 2.786          | 0.00593 **         |
| AmpLag                                     | -7.135          | 9.477             | -0.753         | 0.45249            |
| Weight                                     | 0.044           | 0.058             | 0.753          | 0.45257            |
| Elevation:OrangeBiodom                     | -0.004          | 0.006             | -0.640         | 0.52276            |
| Elevation:YellowBiodom                     | -0.0003         | 0.004             | -0.086         | 0.93150            |
| Elevation:RedBiodom                        | -0.016          | 0.006             | - 2.586        | 0.01050 *          |
| Elevation:BlueBiodom                       | 0.0031          | 0.005             | 0.603          | 0.54708            |

SubsTemp ~ Elevation + Pop + BioDom:Elevation

| <b>Substrate Temp</b> | <b>Estimate</b> | <b>Std. Error</b> | <b>t value</b> | <b>Pr(&gt; t )</b> |
|-----------------------|-----------------|-------------------|----------------|--------------------|
| Intercept             | 27.413          | 0.384             | 71.441         | < 2e-16 ***        |
| Elevation             | -0.001875       | 0.002             | -1.011         | 0.31274            |
| GNBII                 | -2.571          | 0.444             | -5.787         | 2.01e-08 ***       |
| SatMor                | -3.194          | 0.517             | -6.177         | 2.44e-09 ***       |

|                        |        |        |        |              |
|------------------------|--------|--------|--------|--------------|
| NvaLib                 | -3.277 | 1.253  | -2.615 | 0.00943 **   |
| Palestina              | 0.381  | 4.054  | 0.094  | 0.92524      |
| SalUrb                 | 2.433  | 4.633  | 0.525  | 0.59992      |
| PlanLib                | 1.660  | 5.047  | 0.329  | 0.74257      |
| ArrNeg                 | 2.727  | 5.931  | 0.460  | 0.64599      |
| CINvaLib               | 2.836  | 2.61   | 1.083  | 0.2796       |
| NBI                    | 3.066  | 2.534  | 1.210  | 0.22747      |
| LaLoma                 | 3.198  | 2.914  | 1.097  | 0.27345      |
| Palmas                 | 20.810 | 4.852  | 4.308  | 2.32e-05 *** |
| LagLon                 | 22.667 | 5.181  | 4.375  | 1.74e-05 *** |
| RLFlor                 | 22.162 | 5.238  | 4.231  | 3.21e-05 *** |
| AmpLag                 | -0.560 | 11.725 | -0.051 | 0.95926      |
| Elevation:OrangeBiodom | -0.008 | 0.006  | -1.310 | 0.19138      |
| Elevation:YellowBiodom | -0.007 | 0.003  | -2.450 | 0.01495 *    |
| Elevation:RedBiodom    | -0.019 | 0.004  | -4.877 | 1.86e-06***  |
| Elevation:BlueBiodom   | -0.004 | 0.006  | -0.642 | 0.52166      |

AirTemp ~ Elevation + Pop + BioDom:Elevation

| Air Temp               | Estimate | Std. Error | t value | Pr(> t )     |
|------------------------|----------|------------|---------|--------------|
| Intercept              | 26.695   | 0.359      | 74.341  | < 2e-16 ***  |
| Elevation              | -0.002   | 0.002      | -1.088  | 0.27778      |
| GNBII                  | -2.272   | 0.416      | -5.468  | 1.05e-07 *** |
| SatMor                 | -2.686   | 0.484      | -5.551  | 6.86e-08     |
| NvaLib                 | -2.893   | -2.893     | -2.467  | 0.01425 *    |
| Palestina              | -1.903   | 3.794      | -0.502  | 0.61628      |
| SalUrb                 | 0.135    | 4.335      | 0.031   | 0.97515      |
| PlanLib                | -1.346   | 4.723      | -0.285  | 0.77581      |
| ArrNeg                 | -0.535   | 5.550      | -0.096  | 0.92323      |
| CINvaLib               | 4.650    | 2.449      | 1.898   | 0.05872      |
| NBI                    | 4.506    | 2.372      | 1.900   | 0.05854      |
| LaLoma                 | 4.624    | 2.727      | 1.696   | 0.091079     |
| Palmas                 | 19.816   | 4.540      | 4.365   | 1.82e-05 *** |
| LagLon                 | 21.069   | 4.848      | 4.346   | 1.98e-05 *** |
| RLFlor                 | 20.895   | 4.902      | 4.263   | 2.81e-05 *** |
| AmpLag                 | 0.662    | 10.972     | 0.060   | 0.95195      |
| Elevation:OrangeBiodom | -0.004   | 0.005      | -0.737  | 0.46204      |
| Elevation:YellowBiodom | -0.008   | 0.003      | -2.947  | 0.00349 **   |
| Elevation:RedBiodom    | -0.018   | 0.004      | - 4.877 | 1.86e-06 *** |

|                      |        |       |        |         |
|----------------------|--------|-------|--------|---------|
| Elevation:BlueBiodom | -0.004 | 0.005 | -0.748 | 0.45503 |
|----------------------|--------|-------|--------|---------|

Table S3. Estimated values of the fitted linear model of preferred temperature ( $T_{set}$ ) with elevation and bioclimatic domain (BioDom)

Temperature ~ Elevation + Pop + SVL + Weight + Domain:Elevation

|                        | Value    | Std error | t-value   | p-value |
|------------------------|----------|-----------|-----------|---------|
| Intercept              | 18.32509 | 2.128315  | 8.610140  | 0.0000  |
| Elevation              | -0.00263 | 0.015863  | -0.165867 | 0.8683  |
| GNBII                  | 0.70491  | 2.011691  | 0.350409  | 0.7261  |
| SatMor                 | 1.76647  | 2.958486  | 0.597086  | 0.5506  |
| NvaLib                 | 2.43185  | 9.444801  | 0.257481  | 0.7969  |
| Palestina              | 4.63049  | 3.863886  | 1.198403  | 0.2311  |
| SalUrb                 | 2.46680  | 4.221941  | 0.584281  | 0.5592  |
| PlanLib                | 3.31105  | 4.498267  | 0.736073  | 0.4619  |
| ArrNeg                 | 5.01590  | 5.197033  | 0.965147  | 0.3347  |
| CINvaLib               | 9.24224  | 3.160443  | 2.924351  | 0.0035  |
| NBI                    | 5.28888  | 3.096519  | 1.708007  | 0.0880  |
| LaLoma                 | 7.98008  | 3.351273  | 2.381209  | 0.0174  |
| Palmas                 | 1.83505  | 10.101990 | 0.181653  | 0.8559  |
| LagLon                 | 2.26797  | 10.839840 | 0.209226  | 0.8343  |
| RLFlor                 | 3.85055  | 11.052346 | 0.349206  | 0.7270  |
| AmpLag                 | 70.95077 | 9.640842  | 7.359396  | 0.0000  |
| SVL                    | 0.13719  | 0.042836  | 3.202741  | 0.0014  |
| Body mass              | -0.56566 | 0.237544  | -2.381301 | 0.0174  |
| Elevation:OrangeBiodom | -0.00119 | 0.016503  | -0.072270 | 0.9424  |
| Elevation:YellowBiodom | -0.00292 | 0.015979  | -0.182569 | 0.8552  |
| Elevation:RedBiodom    | 0.00156  | 0.017413  | 0.089350  | 0.9288  |
| Elevation:BlueBiodom   | -0.02927 | 0.016503  | -1.773625 | 0.0764  |

Table S4. Estimated values of the fitted linear model of the physiological limits: Critical thermal maximum ( $CT_{max}$ ), critical thermal minimum ( $CT_{min}$ ), and thermal tolerance range (TTR) in relation with elevation, body size (snout-vent length SVL), and bioclimatic domain (BioDom). As well as, warming tolerance ( $WT$ ) and cooling tolerance in relation with elevation and bioclimatic domain (BioDom) and maximum ( $T_{max\_hab}$ ) and minimum ( $T_{min\_hab}$ ) daily temperature.

$CT_{max} \sim$  Elevation + Pop + SVL + BioDom:Elevation

|           | Estimate  | Std. Error | t value | p-value    |
|-----------|-----------|------------|---------|------------|
| Intercept | 36.628753 | 0.956263   | 38.304  | < 2e-16*** |
| Elevation | -0.011794 | 0.004194   | -2.812  | 0.00565 ** |
| GNBII     | 0.513487  | 0.783067   | 0.665   | 0.50688    |
| SatMor    | 0.717410  | 1.063065   | 0.675   | 0.50091    |

|                        |           |           |        |           |
|------------------------|-----------|-----------|--------|-----------|
| NvaLib                 | 5.190772  | 2.770644  | 1.873  | 0.06313   |
| Palestina              | -5.120810 | 4.173799  | -1.227 | 0.22197   |
| SalUrb                 | -7.073525 | 4.748451  | -1.490 | 0.13862   |
| PlanLib                | -9.617112 | 5.071738  | -1.896 | 0.06004 . |
| CINvaLib               | -4.871065 | 3.436926  | -1.417 | 0.15867   |
| NBI                    | -4.308106 | 3.299435  | -1.306 | 0.19384   |
| LaLoma                 | -2.449653 | 3.752014  | -0.653 | 0.51492   |
| Palmas                 | 20.965064 | 11.997125 | 1.748  | 0.08279 . |
| LagLon                 | 23.098280 | 12.906196 | 1.790  | 0.07571 . |
| RLFlor                 | 25.488093 | 13.150522 | 1.938  | 0.05466 . |
| AmpLag                 | -0.605750 | 39.532588 | -0.015 | 0.98780   |
| SVL                    | 0.031760  | 0.023770  | 1.336  | 0.18372   |
| Elevation:OrangeBiodom | 0.015340  | 0.006985  | 2.196  | 0.02977 * |
| Elevation:YellowBiodom | 0.012341  | 0.005049  | 2.444  | 0.01578 * |
| Elevation:RedBiodom    | -0.006420 | 0.009644  | -0.666 | 0.50673   |
| Elevation:BlueBiodom   | 0.011203  | 0.019228  | 0.583  | 0.56111   |

$CT_{min} \sim \text{Elevation} + \text{Pop} + \text{SVL} + \text{BioDom:Elevation}$

|                        | Estimate  | Std. Error | t value | p-value    |
|------------------------|-----------|------------|---------|------------|
| Intercept              | 11.356005 | 1.414581   | 8.028   | 3.7e-13*** |
| Elevation              | 0.004408  | 0.006205   | 0.710   | 0.47864    |
| GNBII                  | -1.446772 | 1.141629   | -1.267  | 0.20717    |
| SatMor                 | -2.888468 | 1.572804   | -1.837  | 0.06842 .  |
| NvaLib                 | -2.517890 | 4.099168   | -0.614  | 0.54006    |
| Palestina              | -9.395028 | 6.178394   | -1.521  | 0.13063    |
| SalUrb                 | -9.969761 | 7.018467   | -1.421  | 0.15770    |
| PlanLib                | -6.839257 | 7.493671   | -0.913  | 0.36300    |
| CINvaLib               | -3.775145 | 5.084918   | -0.742  | 0.45909    |
| NBI                    | -4.565826 | 4.881507   | -0.935  | 0.35124    |
| LaLoma                 | -8.114239 | 5.551095   | -1.462  | 0.14607    |
| Palmas                 | 22.058860 | 17.749743  | 1.243   | 0.21604    |
| LagLon                 | 23.636692 | 19.094713  | 1.238   | 0.21785    |
| RLFlor                 | 22.549260 | 19.456191  | 1.159   | 0.24845    |
| AmpLag                 | 11.023658 | 58.488325  | 0.188   | 0.85078    |
| SVL                    | -0.117657 | 0.035157   | -3.347  | 0.00105 *  |
| Elevation:OrangeBiodom | 0.007213  | 0.010326   | 0.699   | 0.48600    |
| Elevation:YellowBiodom | 0.001151  | 0.007470   | 0.154   | 0.87781    |
| Elevation:RedBiodom    | -0.019656 | 0.014268   | -1.378  | 0.17054    |
| Elevation:BlueBiodom   | -0.010006 | 0.028448   | -0.352  | 0.72558    |

| TTR ~ Elevation + Pop + SVL + BioDom: Elevation |            |            |         |             |
|-------------------------------------------------|------------|------------|---------|-------------|
|                                                 | Value      | Std. Error | t value | p-value     |
| Intercept                                       | 25.289072  | 1.859507   | 13.600  | < 2e-16 *** |
| Elevation                                       | -0.016205  | 0.008155   | -1.987  | 0.04891 .   |
| GNBII                                           | 1.959949   | 1.500377   | 1.306   | 0.19365     |
| SatMor                                          | 3.604428   | 2.067047   | 1.744   | 0.08346     |
| NvaLib                                          | 7.708967   | 5.387298   | 1.431   | 0.15474     |
| Palestina                                       | 4.017297   | 8.208071   | 0.489   | 0.62532     |
| SalUrb                                          | 2.702755   | 9.374068   | 0.288   | 0.77354     |
| PlanLib                                         | -2.904955  | 9.975434   | -0.291  | 0.77133     |
| CINvaLib                                        | -1.087631  | 6.682841   | -0.163  | 0.87096     |
| NBI                                             | 0.263390   | 6.415496   | 0.041   | 0.96731     |
| LaLoma                                          | 5.671594   | 7.295500   | 0.777   | 0.43827     |
| Palmas                                          | -1.103364  | 23.327466  | -0.047  | 0.96234     |
| LagLon                                          | -0.548292  | 25.095082  | -0.022  | 0.9860      |
| RLFlor                                          | 2.926626   | 25.570157  | 0.114   | 0.90905     |
| AmpLag                                          | -11.716451 | 76.868085  | -0.152  | 0.87908     |
| SVL                                             | 0.148825   | 0.046226   | 3.219   | 0.00161     |
| Elevation:OrangeBiodom                          | 0.008270   | 0.013685   | 0.604   | 0.54666     |
| Elevation:YellowBiodom                          | 0.011186   | 0.009817   | 1.140   | 0.25649     |
| Elevation:RedBiodom                             | 0.013245   | 0.018752   | 0.706   | 0.48119     |
| Elevation:BlueBiodom                            | 0.021252   | 0.037388   | 0.568   | 0.57069     |

| Warming Tolerance ~ Elevation + Pop + SVL + BioDom:Elevation |           |            |         |              |
|--------------------------------------------------------------|-----------|------------|---------|--------------|
|                                                              | Estimate  | Std. Error | t value | p-value      |
| Intercept                                                    | 4.498393  | 0.942367   | 4.774   | 4.59e-06 *** |
| Elevation                                                    | -0.011794 | 0.004133   | -2.854  | 0.004995 **  |
| GNBII                                                        | 0.513496  | 0.809855   | 0.674   | 0.501566     |
| SatMor                                                       | 1.034558  | 1.047616   | 0.988   | 0.325121     |
| NvaLib                                                       | 9.907296  | 2.730380   | 3.629   | 0.000401 *** |
| Palestina                                                    | -5.778594 | 4.113144   | -1.405  | 0.162312     |
| SalUrb                                                       | -7.461596 | 4.679445   | -1.595  | 0.113118     |
| PlanLib                                                      | -3.922540 | 4.998034   | -0.785  | 0.433916     |
| CINvaLib                                                     | 2.096926  | 3.386980   | 0.619   | 0.536870     |
| NBI                                                          | 4.837432  | 3.251487   | 1.488   | 0.139112     |
| LaLoma                                                       | 1.253176  | 3.697488   | 0.339   | 0.735184     |
| Palmas                                                       | 21.975768 | 11.822779  | 1.859   | 0.065206 .   |
| LagLon                                                       | 24.108993 | 12.718639  | 1.896   | 0.060124 .   |
| RLFlor                                                       | 33.775888 | 12.959414  | 2.606   | 0.010166 *   |
| AmpLag                                                       | 13.764359 | 38.958087  | 0.353   | 0.724398     |
| SVL                                                          | 0.031778  | 0.023425   | 1.357   | 0.177133     |

|                        |           |          |        |            |
|------------------------|-----------|----------|--------|------------|
| Elevation:OrangeBiodom | 0.016805  | 0.006884 | 2.441  | 0.015912 * |
| Elevation:YellowBiodom | 0.012341  | 0.004975 | 2.480  | 0.014332 * |
| Elevation:RedBiodom    | -0.006420 | 0.009504 | -0.676 | 0.500471   |
| Elevation:BlueBiodom   | 0.011201  | 0.018949 | 0.591  | 0.555403   |

Cooling tolerance ~ Elevation + Pop + SVL+ Biodom:Elevation

|                        | Estimate   | Std. Error | t value | p-value      |
|------------------------|------------|------------|---------|--------------|
| Intercept              | 10.924110  | 1.405363   | 7.773   | 1.54e-12 *** |
| Elevation              | -0.004415  | 0.006165   | -0.716  | 0.47505      |
| GNBII                  | 1.446061   | 1.134190   | 1.275   | 0.20445      |
| SatMor                 | 2.171463   | 1.562554   | 1.390   | 0.16685      |
| NvaLib                 | 0.801758   | 4.072455   | 0.197   | 0.84421      |
| Palestina              | 5.822945   | 6.138132   | 0.949   | 0.34444      |
| SalUrb                 | 6.057311   | 6.972730   | 0.869   | 0.38650      |
| PlanLib                | 1.677172   | 7.444837   | 0.225   | 0.82209      |
| CINvaLib               | -0.949350  | 5.051781   | -0.188  | 0.85121      |
| NBI                    | 0.780392   | 4.849696   | 0.161   | 0.87239      |
| LaLoma                 | 3.019914   | 5.514920   | 0.548   | 0.58485      |
| Palmas                 | -28.352502 | 17.634074  | -1.608  | 0.11014      |
| LagLon                 | -29.931050 | 18.970279  | -1.578  | 0.11689      |
| RLFlor                 | -28.240227 | 19.329401  | -1.461  | 0.14627      |
| AmpLag                 | -21.150598 | 58.107176  | -0.364  | 0.71642      |
| SVL                    | 0.116298   | 0.034928   | 3.330   | 0.00111 **   |
| Elevation:OrangeBiodom | -0.007194  | 0.010258   | -0.701  | 0.48431      |
| Elevation:YellowBiodom | -0.001063  | 0.007421   | -0.143  | 0.88632      |
| Elevation:RedBiodom    | 0.019676   | 0.014175   | 1.388   | 0.16733      |
| Elevation:BlueBiodom   | 0.010106   | 0.028263   | 0.358   | 0.72121      |

$CT_{max} \sim T_{hab\_max} + \text{Elevation} + \text{Pop} + \text{SVL} + \text{BioDom:Elevation}$

|                | Estimate  | Std. Error | t value | p-value    |
|----------------|-----------|------------|---------|------------|
| Intercept      | 35.274117 | 88.341623  | 0.399   | 0.69030    |
| $T_{max\_hab}$ | 0.042161  | 2.751539   | 0.015   | 0.98780    |
| Elevation      | -0.011794 | 0.004194   | -2.812  | 0.00565 ** |
| GNBII          | 0.513487  | 0.771632   | 0.665   | 0.50688    |
| SatMor         | 0.730780  | 1.375244   | 0.531   | 0.59601    |
| NvaLib         | 5.389627  | 13.300854  | 0.405   | 0.68596    |
| Palestina      | -5.103271 | 4.318908   | -1.182  | 0.23941    |
| SalUrb         | -7.042194 | 5.156045   | -1.366  | 0.17424    |
| PlanLib        | -9.321599 | 19.906769  | -0.468  | 0.64034    |
| CINvaLib       | -4.577275 | 19.495774  | -0.235  | 0.81473    |
| NBI            | -3.922511 | 25.387866  | -0.155  | 0.87744    |



|                        |           |           |        |           |
|------------------------|-----------|-----------|--------|-----------|
| LaLoma                 | -2.293528 | 10.869670 | -0.211 | 0.83320   |
| Palmas                 | 21.007664 | 12.304625 | 1.707  | 0.09003 . |
| LagLon                 | 23.140880 | 13.192290 | 1.754  | 0.08165   |
| RLFlor                 | 25.837501 | 26.275255 | 0.983  | 0.32717   |
| AmpLag                 |           |           |        |           |
| SVL                    | 0.031760  | 0.023770  | 1.336  | 0.18372   |
| Elevation:OrangeBiodom | 0.015340  | 0.006985  | 2.196  | 0.02977 * |
| Elevation:YellowBiodom | 0.012341  | 0.005049  | 2.444  | 0.01578 * |
| Elevation:RedBiodom    | -0.006420 | 0.009644  | -0.666 | 0.50673   |
| Elevation:BlueBiodom   | 0.011203  | 0.019228  | 0.583  | 0.56111   |

$$CT_{min} \sim T_{hab\_min} + \text{Elevation} + \text{Pop} + \text{SVL} + \text{BioDom:Elevation}$$

|                        | Estimate   | Std. Error | t value | p-value    |
|------------------------|------------|------------|---------|------------|
| Intercept              | 36.055008  | 130.949703 | 0.275   | 0.78347    |
| $T_{max\_hab}$         | -1.110433  | 5.891633   | -0.188  | 0.85078    |
| Elevation              | 0.004408   | 0.006205   | 0.710   | 0.47864    |
| GNBII                  | -1.446772  | 1.141629   | -1.267  | 0.20717    |
| SatMor                 | -3.680961  | 4.489189   | -0.820  | 0.41364    |
| NvaLib                 | -4.424314  | 10.956953  | -0.404  | 0.68699    |
| Palestina              | -13.346079 | 21.806569  | -0.612  | 0.54152    |
| SalUrb                 | -14.297670 | 23.961182  | -0.597  | 0.55168    |
| PlanLib                | -12.554268 | 31.182541  | -0.403  | 0.68786    |
| CINvaLib               | -8.914123  | 27.760783  | -0.321  | 0.74861    |
| NBI                    | -8.672707  | 22.341227  | -0.388  | 0.69847    |
| LaLoma                 | -13.648683 | 29.902405  | -0.456  | 0.64879    |
| Palmas                 | 15.094555  | 40.931091  | 0.369   | 0.71285    |
| LagLon                 | 16.672386  | 41.530567  | 0.401   | 0.68871    |
| RLFlor                 | 16.260905  | 38.551718  | 0.422   | 0.67383    |
| AmpLag                 |            |            |         |            |
| SVL                    | -0.117657  | 0.035157   | -3.347  | 0.00105 ** |
| Elevation:OrangeBiodom | 0.007213   | 0.010326   | 0.699   | 0.48600    |
| Elevation:YellowBiodom | 0.001151   | 0.007470   | 0.154   | 0.87781    |
| Elevation:RedBiodom    | -0.019656  | 0.014268   | -1.378  | 0.17054    |
| Elevation:BlueBiodom   | -0.010006  | 0.028448   | -0.352  | 0.72558    |

$$CT_{max} \sim CT_{min} + \text{Elevation} + \text{Pop} + \text{SVL} + \text{BioDom:Elevation}$$

|           | Estimate  | Std. Error | t value | p-value     |
|-----------|-----------|------------|---------|-------------|
| Intercept | 38.025016 | 1.145584   | 33.193  | < 2e-16 *** |
| CTmin     | -0.123486 | 0.056909   | -2.170  | 0.03177 *   |
| Elevation | -0.011249 | 0.004159   | -2.704  | 0.00772 **  |
| GNBII     | 0.334946  | 0.768256   | 0.436   | 0.66355     |

|                        |            |           |        |           |
|------------------------|------------|-----------|--------|-----------|
| SatMor                 | 0.361262   | 1.065068  | 0.339  | 0.73499   |
| NvaLib                 | 4.879736   | 2.746384  | 1.777  | 0.07786 . |
| Palestina              | -6.023362  | 4.209520  | -1.431 | 0.15477   |
| SalUrb                 | -7.982854  | 4.802881  | -1.662 | 0.09881 . |
| PlanLib                | -10.169662 | 5.091751  | -1.997 | 0.04780 * |
| CINvaLib               | -5.340310  | 3.409009  | -1.567 | 0.11957   |
| NBI                    | -4.874019  | 3.276443  | -1.488 | 0.13919   |
| LaLoma                 | -3.454240  | 3.742753  | -0.923 | 0.35770   |
| Palmas                 | 23.692558  | 11.942113 | 1.984  | 0.04929 * |
| LagLon                 | 26.020730  | 12.846453 | 2.026  | 0.04479 * |
| RLFlor                 | 28.277122  | 13.080801 | 2.162  | 0.03240 * |
| AmpLag                 | 0.787727   | 39.138225 | 0.020  | 0.98397   |
| SVL                    | 0.017451   | 0.024456  | 0.714  | 0.47674   |
| Elevation:OrangeBiodom | 0.015905   | 0.006978  | 2.279  | 0.02421 * |
| Elevation:YellowBiodom | 0.012485   | 0.004998  | 2.498  | 0.01369 * |
| Elevation:RedBiodom    | -0.008850  | 0.009612  | -0.921 | 0.35880   |
| Elevation:BlueBiodom   | 0.009951   | 0.019043  | 0.523  | 0.60213   |

Table S5. Information of the localities sampled, and microclimatic temperatures recorded in each site of study. The geographic information is in UTM coordinates, elevation in meters.  $T_{hab\_max}$  is the average daily maximum temperature,  $T_{hab\_min}$  is the average daily minimum temperature,  $T_{max}$  is the maximum temperature recorded,  $T_{min}$  is the minimum temperature recorded,  $T_{mean}$  is the average of temperature recorded, and days refers to the number of the days of recorded temperature.

| Bioclimatic domain | Pop      | x      | y       | Elevation (m) | Datalogger (°C) |           |                |           |            |      |
|--------------------|----------|--------|---------|---------------|-----------------|-----------|----------------|-----------|------------|------|
|                    |          |        |         |               | $T_{hab\_max}$  | $T_{max}$ | $T_{hab\_min}$ | $T_{min}$ | $T_{mean}$ | Days |
| Green              | GNBII_II | 513395 | 1709839 | 125           |                 |           |                |           |            |      |
| Green              | GNBII    | 516381 | 1712152 | 248           | 32.13           | 40.46     | 22.24          | 17.87     | 25.88      | 734  |
| Green              | SatMor   | 536218 | 1700986 | 309           | 31.81           | 47.35     | 21.53          | 17.94     | 25.27      | 560  |
| Green              | NvaLib   | 519484 | 1713651 | 768           | 27.41           | 34.76     | 20.53          | 17.94     | 22.77      | 262  |
| Orange             | Palest   | 527176 | 1747735 | 736           | 31.71           | 47.52     | 18.68          | 10.44     | 23.19      | 484  |
| Orange             | SalUrb   | 519364 | 1745037 | 834           | 31.39           | 45.40     | 18.35          | 11.03     | 22.98      | 480  |
| Orange             | PlaLib   | 508790 | 1745088 | 902           | 25.12           | 32.98     | 17.10          | 8.643     | 20.77      | 860  |
| Orange             | ArrNeg   | 494831 | 1751953 | 1073          |                 |           |                |           |            |      |
| Yellow             | CINLib   | 521006 | 1713083 | 1185          | 25.16           | 36.09     | 17.61          | 13.86     | 20.23      | 352  |
| Yellow             | NBI      | 520347 | 1719025 | 1148          | 22.98           | 27.58     | 18.54          | 13.5      | 20.28      | 793  |
| Yellow             | LaLoma   | 538462 | 1708107 | 1302          | 28.43           | 44.90     | 17.26          | 12.85     | 20.82      | 814  |
| Red                | Palmas   | 522520 | 1721465 | 1401          |                 |           |                |           |            |      |
| Red                | LagLon   | 527235 | 1722574 | 1523          | 31.12           | 42.48     | 15.97          | 11.47     | 20.61      | 356  |
| Red                | RLFlor   | 539699 | 1706913 | 1494          | 23.84           | 38.09     | 16.58          | 11.22     | 19.00      | 781  |
| Blue               | AmpLag   | 534514 | 1715118 | 2137          | 17.76           | 23.35     | 12.31          | 4.58      | 14.70      | 780  |

Table S6. Mean local humidity in percent per locality sampled during the rainy and dry seasons, as recorded by dataloggers. The number in parentheses represents the minimum and maximum percent recorded.

|                    |           | Rainy season           | Dry season               |
|--------------------|-----------|------------------------|--------------------------|
| Bioclimatic domain | Elevation | Mean % Humidity        | Mean % Humidity          |
| Pop                |           |                        |                          |
| Green              |           |                        |                          |
| GNBII              | 248       | 94.19<br>(43.56 – 100) | 80.05<br>(28.27 – 100)   |
| SatMor             | 309       | 93.84<br>(45.99 – 100) | 80.87<br>(27.5 – 100)    |
| NvaLib             | 768       | 93.20<br>(54.12 – 100) | 70.79<br>(37.27 – 99.43) |
| Orange             |           |                        |                          |
| Pales              | 736       | 92.41<br>(43.57 – 100) | 75.02<br>(11.09 – 100)   |
| SalUrb             | 834       | 91.70<br>(34.42 – 100) | 75.42<br>(17.51 – 100)   |
| PlanLib            | 902       | 97.75<br>(48.42 – 100) | 85.33<br>(22.04) – 100)  |
| Yellow             |           |                        |                          |
| CINvaLib           | 1185      | 94.85<br>(52.99 – 100) | 80.51<br>(36.50 – 100)   |
| NBI                | 1148      | 98.40<br>(50.17 – 100) | 87.04<br>(44.01 – 100)   |
| LaLoma             | 1302      | 93.73<br>(31.71 – 100) | 78.84<br>(16.75 – 100)   |
| Red                |           |                        |                          |
| LagLon             | 1523      | 87.97<br>(39.06 – 100) | 77.24<br>(20.48 – 100)   |
| RLFlor             | 1494      | 95.56<br>(41.43 – 100) | 83.09<br>(27.79 – 100)   |
| Blue               |           |                        |                          |
| AmpLag             | 2137      | 99.31<br>(67.72 – 100) | 93.74<br>(39.16 – 100)   |

## Figures

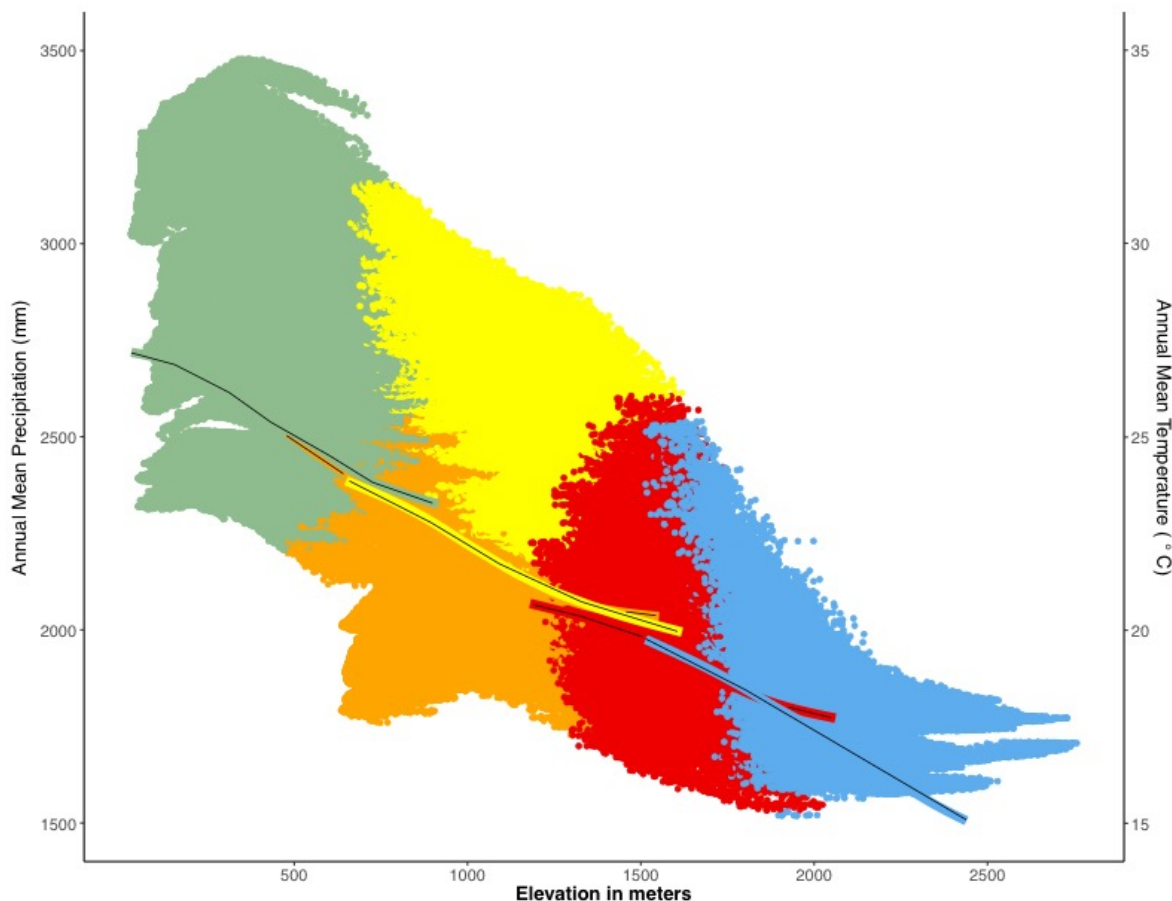

Figure S1. Annual mean precipitation and annual mean temperature (blacklines) along elevational gradient of each bioclimatic domain (BioDom) in the study area (different colors). Green BioDom represent the environment with high annual temperature and precipitation, and lowland areas. Yellow BioDom is characterized by high precipitation in the warmest quarter and intermediate elevations. Orange BioDom characterized by the temperature seasonality and intermediate elevations. Red BioDom with higher elevations from 1180 m – 2061 m a.s.l., and blue BioDom is the area with high precipitation in driest season and high elevations.

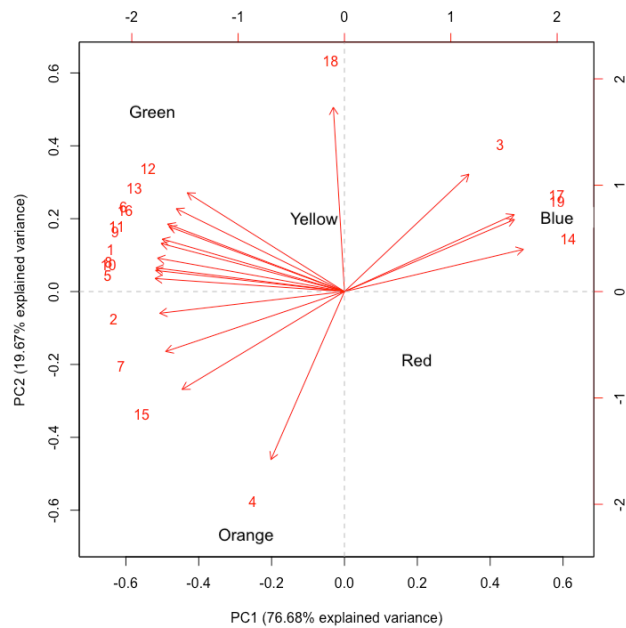

Figure S2. Principal components analysis of the 19 bioclimatic variables for the five bioclimatic domains. Numbers of bioclimatic variables are shown as in Table S1.

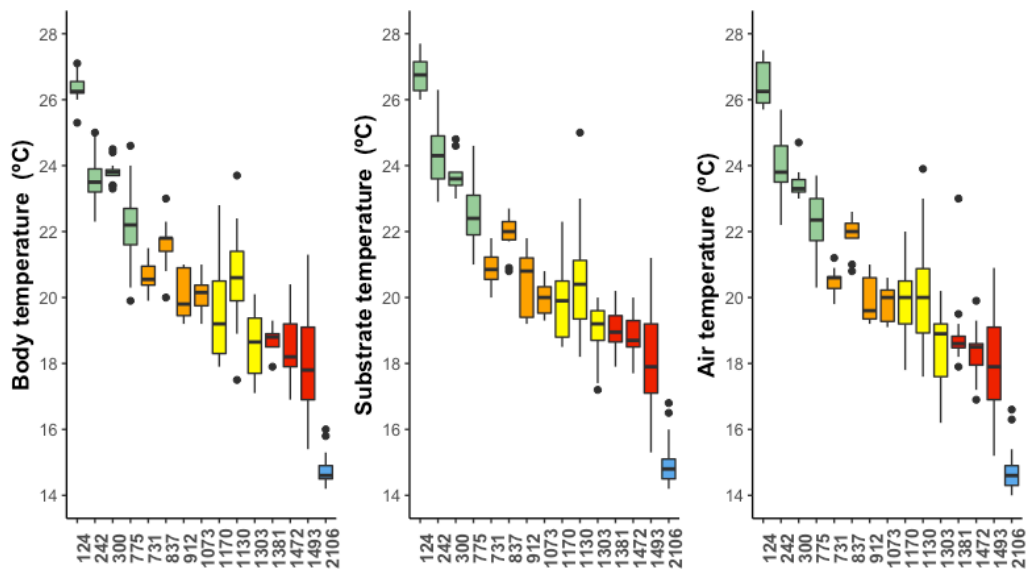

Figure S3. Body temperature ( $T_b$ ), substrate and air temperature in *Craugastor loki* frogs, along the elevational gradient for different bioclimatic domains (colors) described in Fig. 1 and Table S1. The data were taken only during active hours, from dusk to dawn. The x axis represents the elevation in meters.

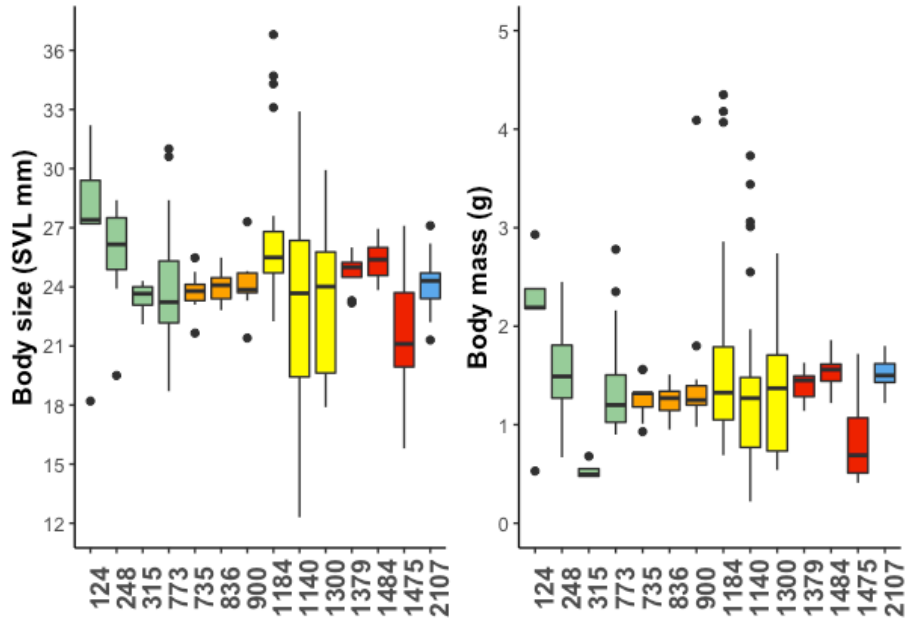

Figure S4. Body size (snout – vent length in mm) and body mass (g) in *Craugastor loki* frogs, along the elevation gradient for different bioclimatic domains (colors) described in Fig. 1 and Table S1. The x axis represents the elevation in meters.

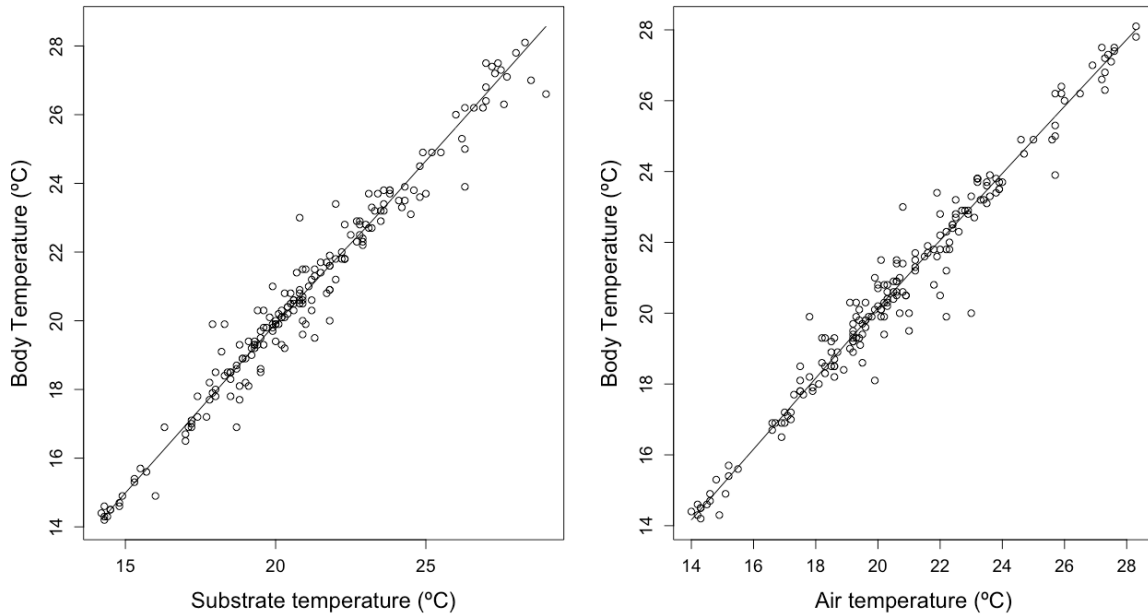

Figure S5. Relationship between body temperature ( $T_b$ ) and substrate and air temperature of the overall populations sampled ( $r^2 = 0.9647$ ,  $p < 0.005$ ,  $n = 191$ ;  $r^2 = 0.8289$ ,  $p < 0.005$ ,  $n = 205$ , respectively).

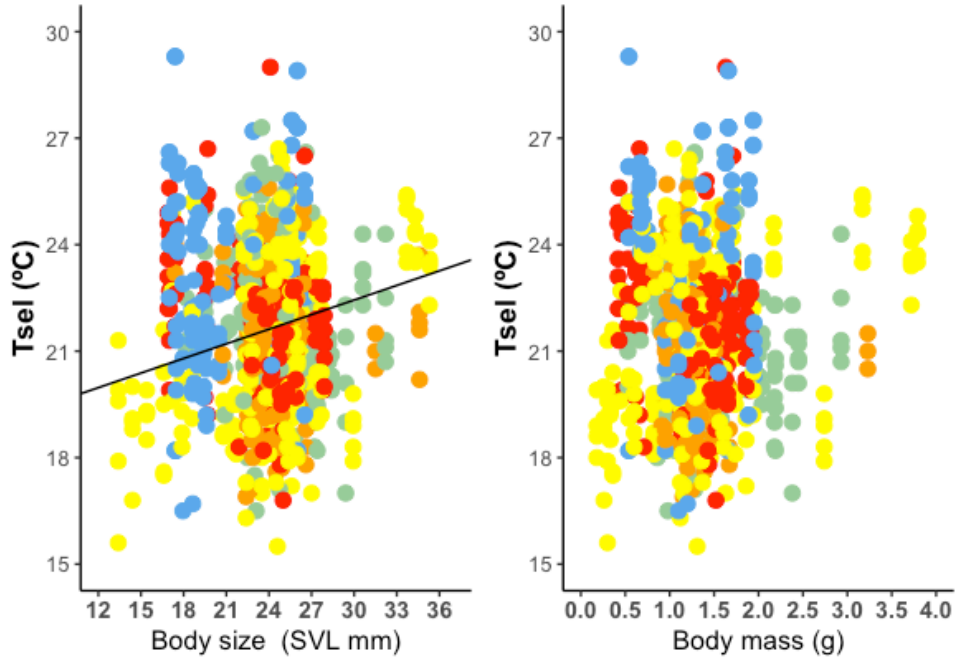

Figure S6. Relationship between  $T_{sel}$  with the body size (snout-vent length SVL in mm) (a) and body mass in g (b), along the elevational gradient. Each dot represents one measure of  $T_{sel}$  of each one individual. Solid line represents a significant relationship ( $p < 0.05$ ). Colors correspond to each bioclimatic domain described in Fig. 1a, Table S1.

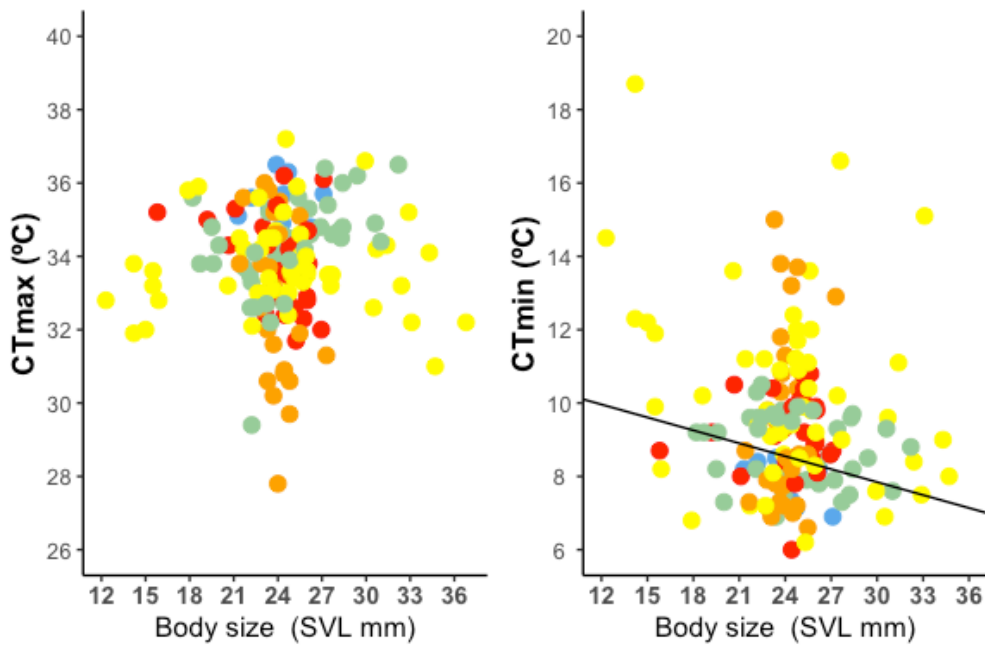

Figure S7. Relationship between CTmax and body size measured as snout-vent length SVL in mm (c) and CTmin with respect to body size (SVL) (d). Solid line represents a



significant relationship ( $p < 0.05$ ). Colors correspond to each bioclimatic domain described in Fig. 1a, Table S1.

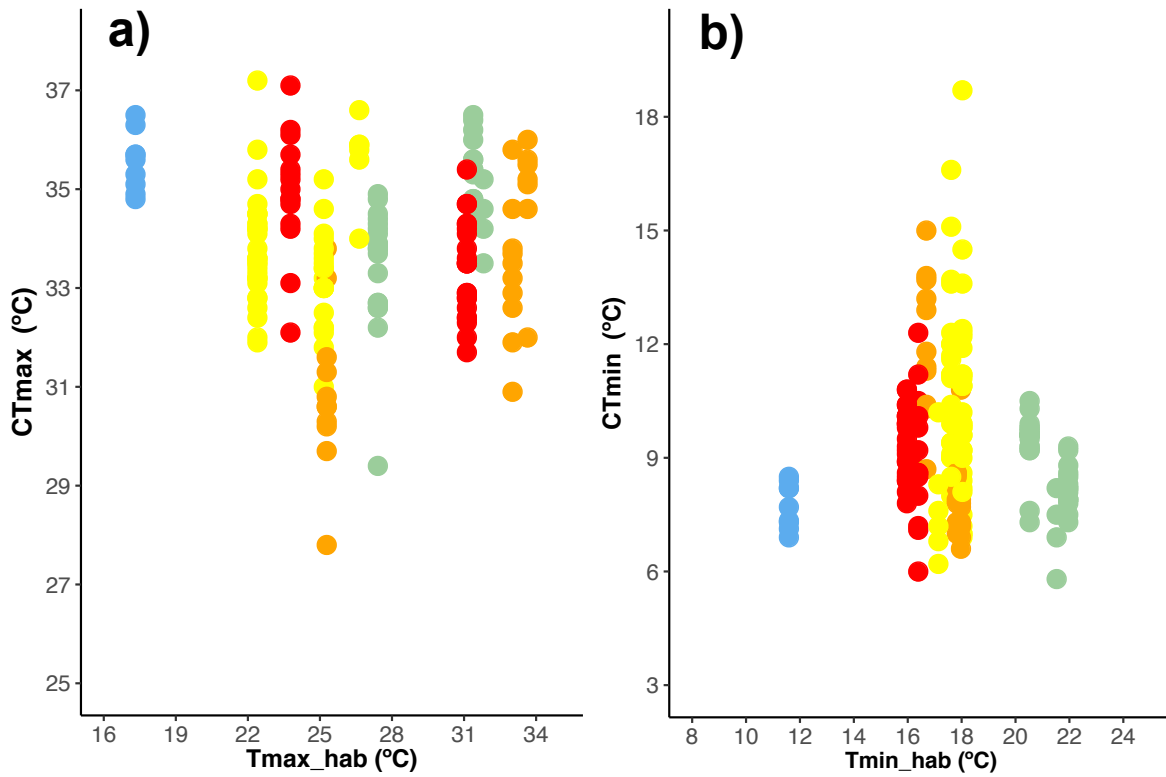

Figure S8. (a) Relationship between critical thermal limits with the maximum daily temperature and (b) minimum daily temperature, along the elevational gradient. Colors correspond to each bioclimatic domain described in Fig. 1a, Table S1.

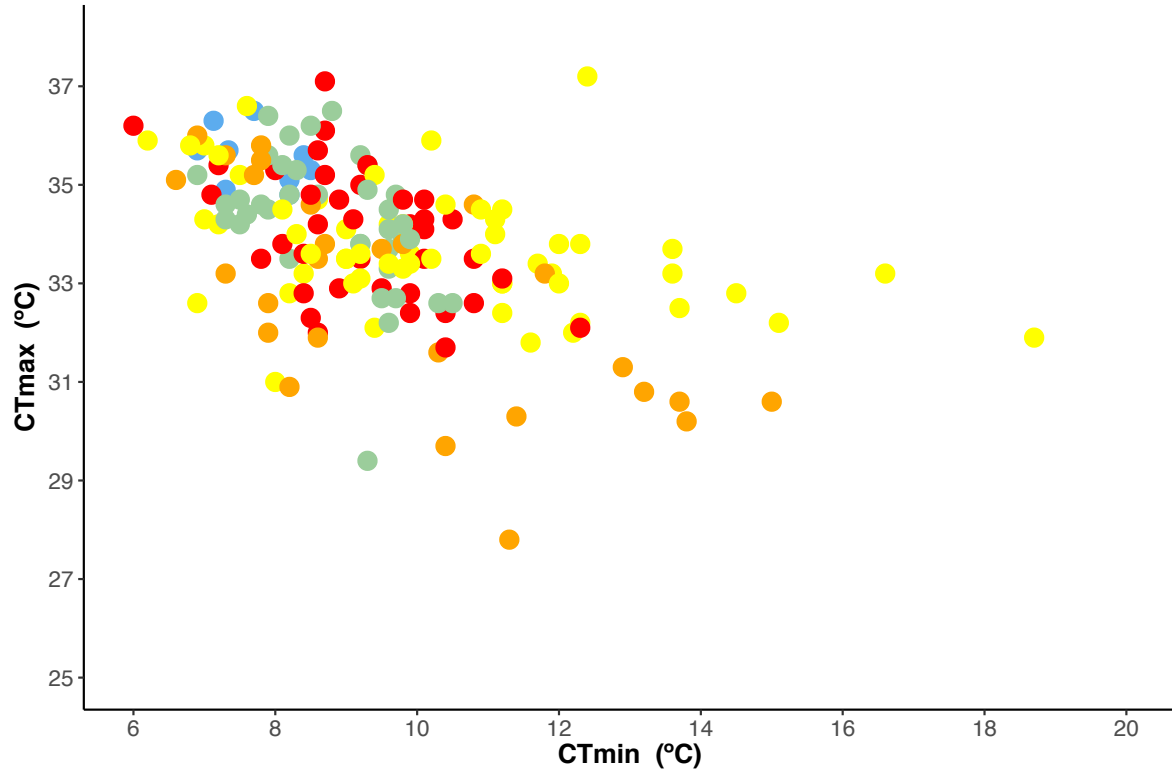

Figure S9. General relationship between both critical thermal limits ( $F_{20,135} = 10.73$ ,  $R^2 = 0.556$ ,  $p < 0.0001$ ). Colors represent each bioclimatic domain as described in Fig. 1a, and Table S1.

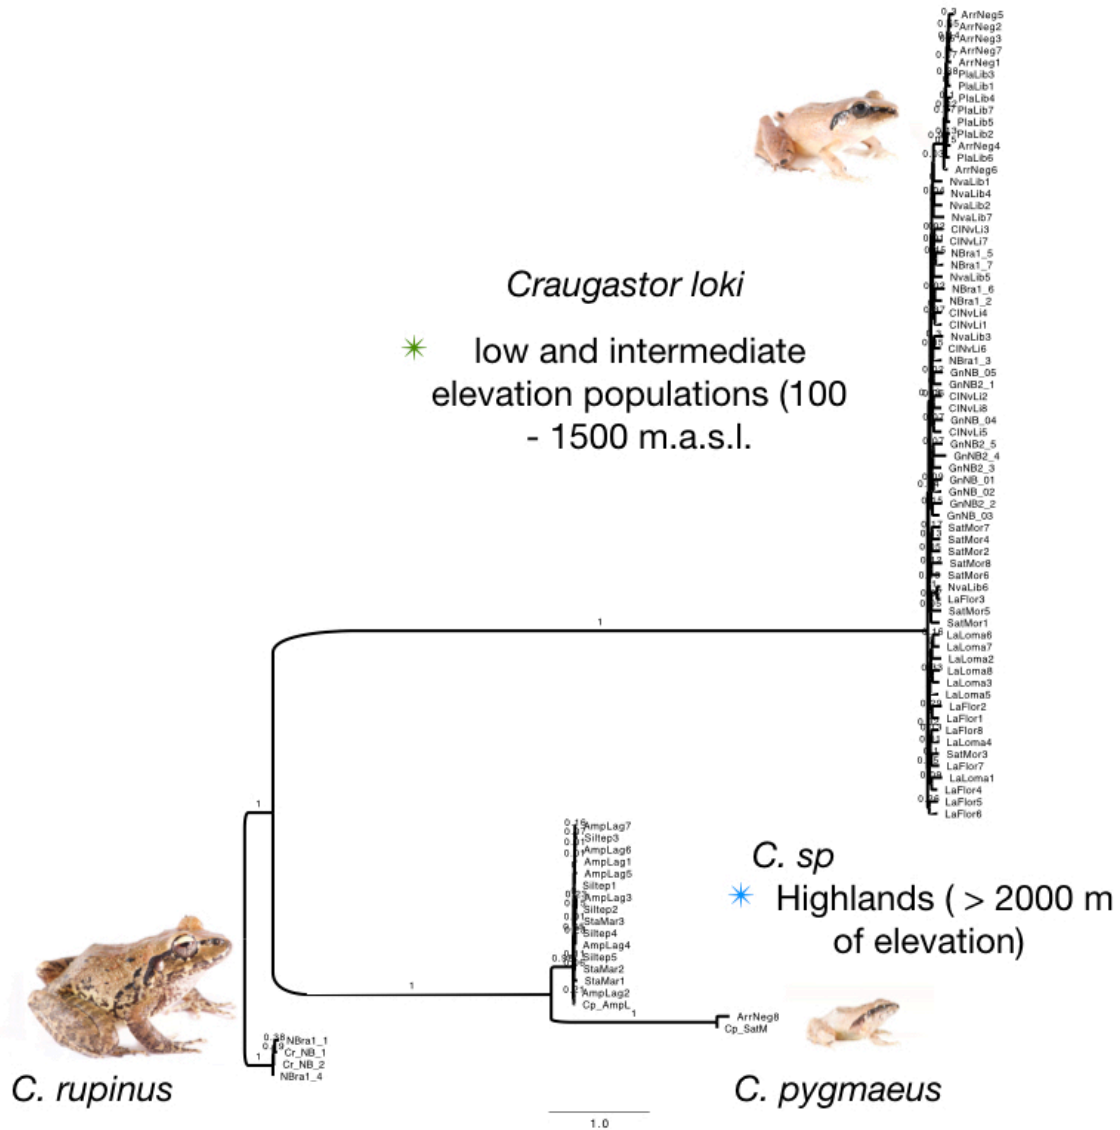

Figure S10. Preliminary results of phylogenetic analysis performed with RADseq data of *Craugastor loki* and outgroups *Craugastor pygmaeus* and *Craugastor rupinus*. Using the maximum-likelihood program RAXML, bootstrap support values are above each node. Individuals from higher elevation (bioclimatic domain blue) represent another species of *Craugastor*. This analysis corresponds of unpublished data on landscape genomics study in preparation.
